# Supplementary material for: Inclusion complexes of the macrocycle nonactin with benchmark protonated amines: aniline and serine
Source: Royal Society of Chemistry journal article supplement (doi:10.1039/d2cp00264g), 2022-01-01
Supplement: d2cp00264g1.pdf [file d2cp00264g1.pdf]

# Supplementary Information to the manuscript: Inclusion complexes of the macrocycle nonactin with benchmark protonated amines: aniline and serine

Juan Ramón Avilés–Moreno<sup>§</sup>, Francisco Gámez<sup>¶</sup>, Giel Berden<sup>‡</sup>, Jos Oomens<sup>‡</sup>, Bruno Martínez–Haya<sup>†\*</sup>

<sup>§</sup> *Department of Applied Physical Chemistry, Universidad Autónoma de Madrid, 28049, Madrid, Spain*

<sup>¶</sup> *Departamento de Química Física, Universidad Complutense, 28040 Madrid, Spain*

<sup>‡</sup> *Radboud University, Institute for Molecules and Materials,  
FELIX Laboratory, Toernooiveld 7, 6525ED Nijmegen, The Netherlands.*

<sup>†</sup> *Department of Physical, Chemical and Natural Systems,  
Universidad Pablo de Olavide, 41013 Seville, Spain*

(Dated: March 8, 2022)

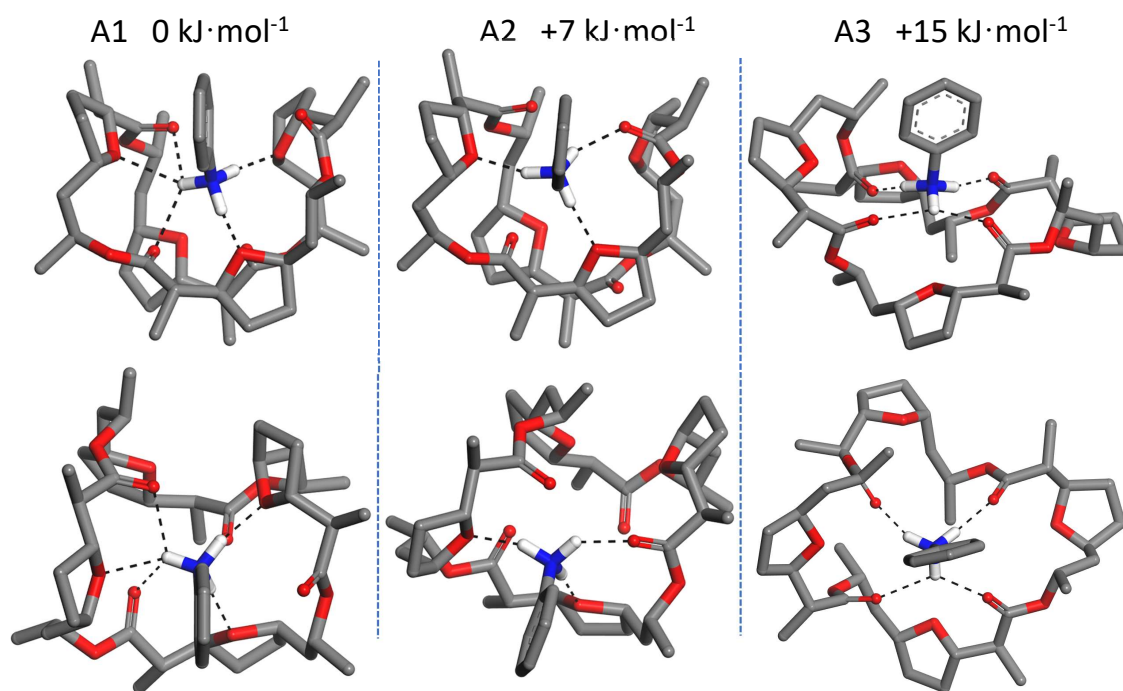

FIG. 1: Low-energy conformations found in this work for the Non-AniH<sup>+</sup> complex (side and top views). The H atoms of the nonactin macrocycle and of the phenyl side group of aniline are not shown for a better visualization of the host–guest coordination arrangement. Relative zero-point corrected electronic energies are provided for the conformers at the M06-2X/6-311++G(2df,2pd) level.

\* author for correspondence: bmarhay@upo.es

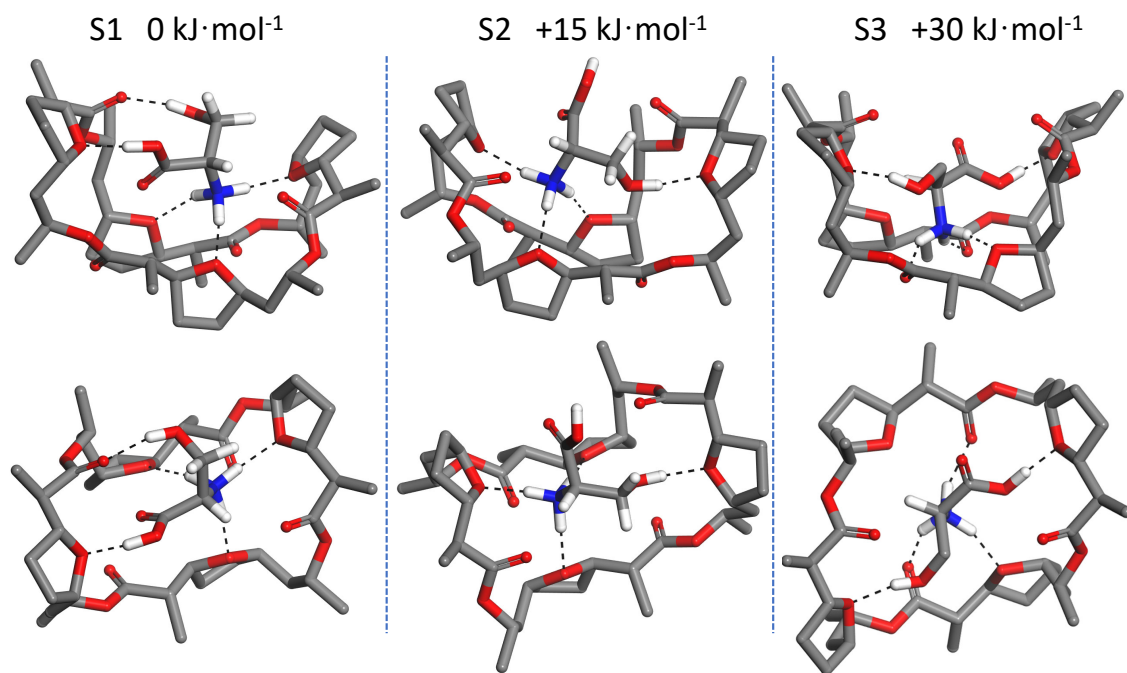

FIG. 2: Low-energy conformations found in this work for the Non-SerH<sup>+</sup> complex (side and top views). The H atoms of the nonactin macrocycle and of the phenyl side group of aniline are not shown for a better visualization of the host-guest coordination arrangement. Relative zero-point corrected electronic energies are provided for the conformers at the M06-2X/6-311++G(2df,2pd) level.
